# Supplementary material for: ezRAD: a simplified method for genomic genotyping in non-model organisms
Source: PubMed Central journal article supplement (PMC3840413; doi:10.7717/peerj.203), 2013-11-19
Supplement: peerj-01-203-s001.pdf [file peerj-01-203-s001.pdf]

ezRAD Modifications to Illumina TruSeq DNA Kit Protocol

Modified from Ethan Ford's TruSeq RNA Kit protocol

[http://ethanomics.files.wordpress.com/2012/02/truseq\\_rna\\_kit\\_protocol\\_third2.pdf](http://ethanomics.files.wordpress.com/2012/02/truseq_rna_kit_protocol_third2.pdf)

### **Perform End Repair**

1. Use 13.3  $\mu$ l of End Repair Mix instead of 40  $\mu$ l.
2. Add 53.3  $\mu$ l of Ampure XP Beads instead of 160  $\mu$ l.
3. Place on magnetic rack for 5 minutes instead of 15 minutes.
4. Add 10  $\mu$ l Resuspension Buffer instead 17.5  $\mu$ l.
5. Incubate at room temperature for 5 minutes instead of 2 minutes.
6. Transfer 9  $\mu$ l of the supernatant to a new 0.2 ml PCR tube instead of 15  $\mu$ l.

### **Adenylate 3' Ends**

1. Add 4.17  $\mu$ l A-Tailing Mix to sample instead of 12.5  $\mu$ l.

### **Ligate Adapters**

1. Change recipe to : 0.83  $\mu$ l DNA Ligase Mix, 0.83  $\mu$ l Resuspension Buffer, 0.83  $\mu$ l Adapter Index .
2. Add 1.67  $\mu$ l Stop Ligase Mix instead of 5  $\mu$ l.
3. Add 20  $\mu$ l of AMPure XP beads instead of 42.5  $\mu$ l.
4. Place on magnetic rack for 5 minutes instead of 2 minutes.
5. Add 27  $\mu$ l Resuspension Buffer instead of 52.5  $\mu$ l.
6. Place in magnetic rack for 5 minutes instead of 2 minutes.
7. Transfer 26  $\mu$ l of the supernatant to a new 0.2 ml PCR tube instead of 50  $\mu$ l.
8. Add 26  $\mu$ l of well-mixed AMPure XP beads instead of 50  $\mu$ l.
9. Place on magnetic rack for 5 minutes instead of 2 minutes.

10. Add 25  $\mu$ l Resuspension Buffer instead of 22.5  $\mu$ l.
11. Place in magnetic rack for 5 minutes instead of 2 minutes.
12. Transfer 23  $\mu$ l of the supernatant to a new 0.2 ml PCR tube.

**Proceed directly to Enrich DNA Fragments**

1. Modify PCR mix as follows: 10  $\mu$ l of ligated DNA, 1.67  $\mu$ l PCR Primer Cocktail, 8.33  $\mu$ l PCR Master Mix.
2. Use 15-18 cycles of PCR instead of 10.

**Return to Purify Ligation Products**

1. Add 5  $\mu$ l of 4X loading buffer to each sample and to ladder instead of 7  $\mu$ l.
