# Supplementary material for: ezRAD: a simplified method for genomic genotyping in non-model organisms
Source: PubMed Central journal article supplement (PMC3840413; doi:10.7717/peerj.203), 2013-11-19
Supplement: peerj-01-203-s002.pdf [file peerj-01-203-s002.pdf]

```

#!/bin/bash

#Script to automatically process X number samples, produce a reference assembly, map reads
back to the assembly, and call SNPs

#Developed and written by Jonathan B. Puritz - jpuritz@gmail.com

#This pipeline depends on:

#Trim Galore! http://www.bioinformatics.babraham.ac.uk/projects/trim\_galore/
#Cutadapt http://code.google.com/p/cutadapt/
#Rainbow http://sourceforge.net/projects/bio-rainbow/files/
#FASTX-Toolkit http://hannonlab.cshl.edu/fastx\_toolkit/download.html
#BWA http://bio-bwa.sourceforge.net
#SAMtools http://samtools.sourceforge.net
#VarScan2 http://varscan.sourceforge.net
#VCFtools http://vcftools.sourceforge.net

###Make sure to update your $PATH settings and the paths to the jar and perl files###
###YOU MUST ENTER A MINIMUM ALLELE FREQUENCY WITH THIS SCRIPT#####
###IT CAN BE ESTIMATED BY 1 / (2 * THE NUMBER OF INDIVIDUALS)#####
###Rainbow (the assembler) needs this information to properly function#####
###Correct usage: sh ezRADpipeline.sh <freq>#####
###Rename all FASTQ files to "Sample1.R1.fq" "Sample1.R2.fq"#####

###Begin Code###

#Simple way of keeping track of files

ls *.R1.fq > namelist

sed -i 's/.R1.fq/g' namelist

```

```
NAMES=(`cat "namelist" `)
```

```
mkdir assembly
```

```
#Trims raw files two different ways.
```

```
# First way removes any reads with substantial amounts of adapter, but does no quality trimming. These reads are used for assembly and must be uniform lengths
```

```
# Second way removes adapters and does quality trimming. These reads will be used for mapping.
```

```
for i in "${NAMES[@]}"
```

```
do
```

```
trim_galore --paired -q 0 --length 90 -a
```

```
GATCGGAAGAGCACACGTCTGAACTCCAGTCACNNNNNNATATCGTATGCCGTCTTCTGCTTG -a2
```

```
GATCGGAAGAGCGTCGTGTAGGGAAAGAGTGTAGATCTCGGTGGTCGCCG --stringency 20 $i.R1.fq $i.R2.fq --output_dir ./assembly
```

```
trim_galore --paired -q 20 --length 20 -a
```

```
GATCGGAAGAGCACACGTCTGAACTCCAGTCACNNNNNNATATCGTATGCCGTCTTCTGCTTG -a2
```

```
GATCGGAAGAGCGTCGTGTAGGGAAAGAGTGTAGATCTCGGTGGTCGCCG --stringency 10 $i.R1.fq $i.R2.fq
```

```
done
```

```
#Renaming trimmed files to simpler names
```

```
for i in "${NAMES[@]}"
```

```
do
```

```
mv $i.R1_val_1.fq $i.1.fq
```

```
mv $i.R2_val_2.fq $i.2.fq
```

```
done
```

```
###Assembly###
```

```
###These parameters could be further optimized for particular taxa
```

```
#First step concatenates reads into one forward and one reverse fastq file
```

```
cat ./assembly/*.R1_val_1.fq > forward
```

```
cat ./assembly/*.R2_val_2.fq > reverse
```

```
#Rainbow now clusters and assembles
```

```
rainbow cluster -1 forward -2 reverse > cat.rbcluster.out 2> log
```

```
rainbow div -i cat.rbcluster.out -o cat.rbddiv.out -f $1
```

```
rainbow merge -a -i cat.rbddiv.out -o cat.rbasm.out -N 1000
```

```
perl /path to/select_best_rbcontig.pl cat.rbasm.out > rainbow
```

```
#Renames contigs to sequential numbers for simplicity
```

```
fastx_renamer -n COUNT -i rainbow -o reference
```

```
##Mapping
```

```
#Use BWA to index reference
```

```
bwa0.7 index -a bwtsv reference
```

```
#Use BWA to map reads to reference.
```

```
###These parameters could be further optimized for particular taxa
```

```
for i in "${NAMES[@]}"
```

```
do
```

```
bwa0.7 mem reference $i.1.fq $i.2.fq -t 32 -a -T 10 > $i.sam
```

```
done
```

```
#Convert Sam to Bam and remove low quality, ambiguous mapping
```

```
for i in "${NAMES[@]}"
```

```
do
```

```
samtools view -bS -q15 $i.sam > $i.bam
```

```
samtools sort $i.bam $i
```

```
done
```

```
#Index reference for SAMtools
```

```
samtools faidx reference
```

```
##SNP Calling
```

```
###These parameters could be further optimized for a particular taxon
```

```
###Note that the this protocol keeps SAMTools BAQ calculation which may be too conservative for certain taxa. Also, VarScan can be futher optimized for individual and pooled samples.
```

```
#SAMtools performs local realignment around INDELS
```

```
samtools mpileup -D -f reference *.bam >mpileup
```

```
#VarScan calls all sites with at least 5X coverage, a variant frequency above 10%, and 95% probability of being a SNP
```

```
java -jar /path to/VarScan.v2.3.5.jar mpileup2snp mpileup --output-vcf --min-coverage 5 --strand-filter 0 --min-var-freq 0.1 --p-value 0.05 >SNPS.vcf
```

```
#VCFtools to filter raw SNPs and create a filtered vcf file (Final.recode.vcf) with SNPs that are present in every individual and that are not INDELS
```

```
vcftools --vcf SNPS.vcf --geno 0.99 --out Final --recode --non-ref-af 0.001 --remove-indels
```

```
#VCFtools again to filter for SNPs that are present at an average of 10X coverage
```

```
vcftools --vcf Final.recode.vcf --out Final10X --recode --min-meanDP 10
```
